# Supplementary material
Source: Royal Society of Chemistry journal article supplement (doi:10.1039/d6ta00859c)
Supplement: d6ta00859c1.pdf [file d6ta00859c1.pdf]

## Supplementary Data

# Regenerated cellulose fibers from coaxial wet spinning of alginate with excellent flame retardancy

Yueying Zhang <sup>a</sup>, Jiuyong Yao <sup>a</sup>, Kai Li <sup>a</sup>, Shengkang Wang <sup>a</sup>, Yide Liu <sup>b,\*</sup>, Yanzhi Xia <sup>a,\*</sup>

<sup>a</sup> College of Materials Science and Engineering, Qingdao University, Qingdao 266071,

China

<sup>b</sup> Textile and Clothing College, Qingdao University, Qingdao 266071, China

\*Corresponding authors: Yide Liu (liuyd9519@163.com); Yanzhi Xia

(xiayz@qdu.edu.cn)

## Supporting Figures and Tables

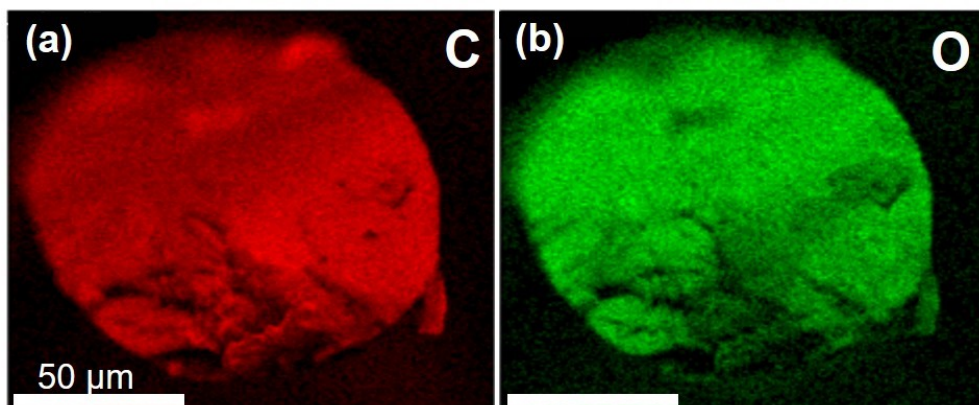

Fig. S1 Elemental mapping of C and O for RCF.

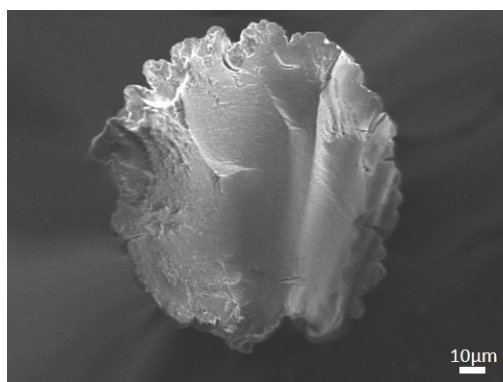

Fig.S2 Cross-sectional view of CAF after cyclic washing.

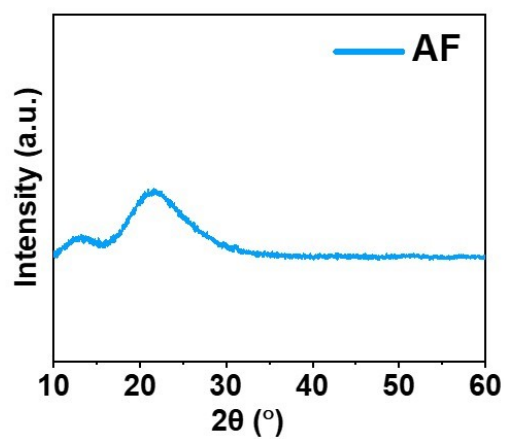

Fig. S3 XRD pattern of AF.

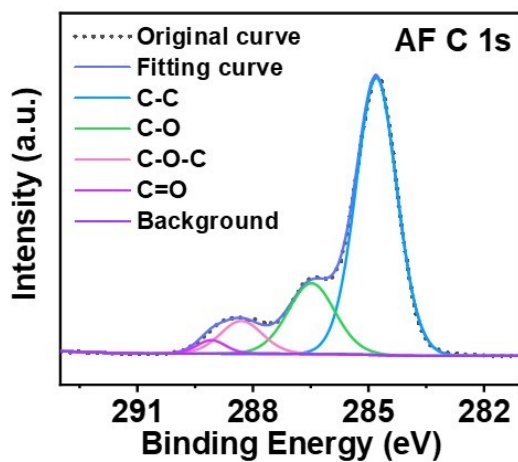

Fig. S4 C 1s XPS spectrum of AF.

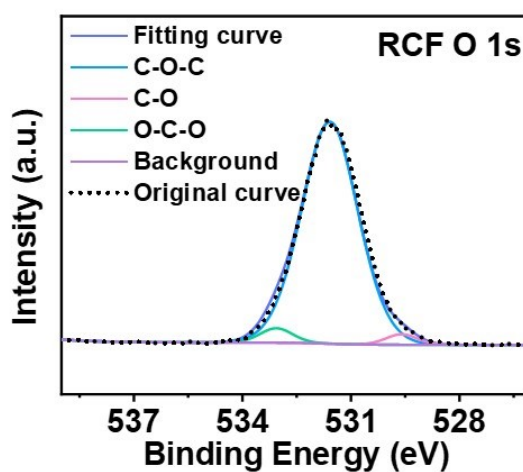

Fig. S5 O 1s XPS spectrum of RCF.

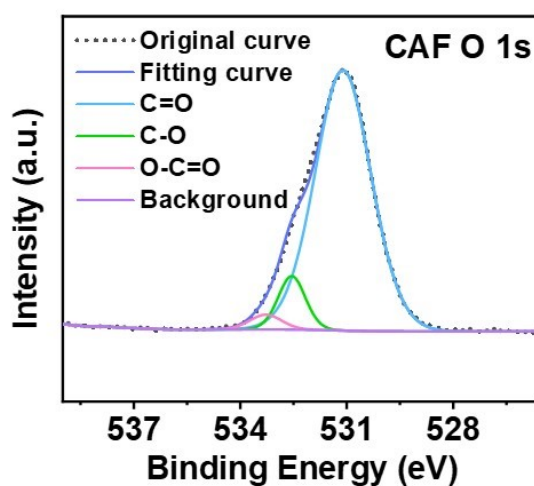

Fig. S6 O 1s XPS spectrum of CAF.

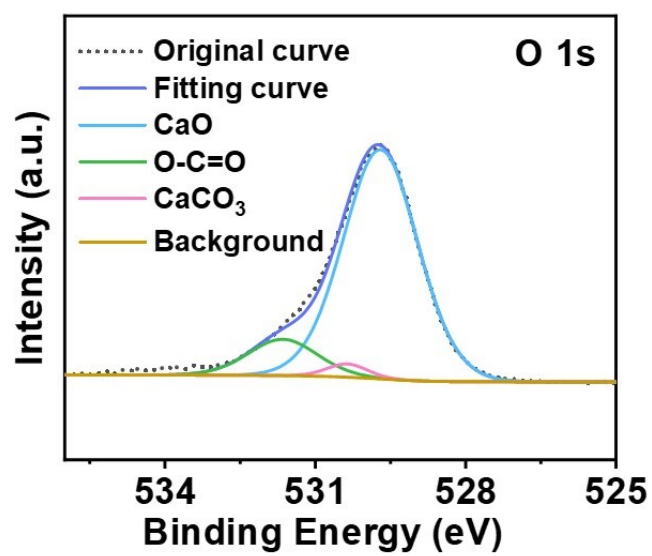

Fig. S7 O 1s XPS spectrum of CAF carbon residue.

## Tables

**Table S1** Comparison with the reported strengths of coaxial/uniaxial composite fibers.

| <b>Sample</b>                           | <b>Components</b>                                                                                                                                                                                                                | <b>Strain (%)</b> | <b>Stress (MPa)</b> | <b>Ref.</b> |
|-----------------------------------------|----------------------------------------------------------------------------------------------------------------------------------------------------------------------------------------------------------------------------------|-------------------|---------------------|-------------|
| CS/RO-CNC<br>(coaxial)                  | Shell: chitosan (CS)<br>Core: cellulose nanocrystals (CNCs) after modification                                                                                                                                                   | 7.8               | 82                  | [26]        |
| CNF1.5/PW<br>(coaxial)                  | Shell: cellulose<br>Core: cellulose nanofibrils (CNFs)<br>paraffin wax (PW)                                                                                                                                                      | 132               | 13.5                | [27]        |
| CNT@MXene<br>(coaxial)                  | Shell: carbon nanotubes (CNTs)<br>thermoplastic polyurethane (TPU)<br>Core: MXene/TPU                                                                                                                                            | 513               | 10.1                | [28]        |
| CGF                                     | Cellulose                                                                                                                                                                                                                        | 20                | 71.8                | [29]        |
| CNF/SA                                  | CNF/sodium alginate (SA)                                                                                                                                                                                                         | 13                | 2.8                 | [30]        |
| HSiO <sub>2</sub> /C@C<br>(coaxial)     | Shell: hollow silica (HSiO <sub>2</sub> )<br>Core: cellulose                                                                                                                                                                     | 29                | 27                  | [31]        |
| MXene/MnO <sub>2</sub> -RC<br>(coaxial) | Cellulose/MnO <sub>2</sub> /MXene                                                                                                                                                                                                | 9                 | 145.8               | [32]        |
| TTF-60<br>(coaxial)                     | Shell: poly( <i>p</i> -phenylene benzobisoxazole) nanofibers (PNFs)/montmorillonite (MMT) protecting<br>Core: poly(3,4-ethylenedioxythiophene)-poly(styrene sulfonate) (PEDOT:PSS)<br>single-walled carbon nanotube (SWCNT-COOH) | 13.8              | 12.3                | [33]        |
| SA/MWCNT                                | Shell: SA<br>multi-walled carbon nanotubes (MWCNT)<br>Core: SA/MWCNT<br>The core and shell have different MWCNT concentrations.                                                                                                  | 10                | 111.8               | [34]        |
| MLM                                     | Shell: waterborne polyurethane (WPU)/SA<br>Core: magnetic liquid metal (MLM)/WPU                                                                                                                                                 | 780               | 32                  | [35]        |
| This work                               | Shell: cellulose<br>Core: SA                                                                                                                                                                                                     | 20.5              | 137.4               |             |

**Table S2** Calcium ion concentrations in CAF with different shell layer concentrations.

| <b>Sample</b>                   | <b>CAF-1</b>          | <b>CAF-2</b>           | <b>CAF-3</b>           |
|---------------------------------|-----------------------|------------------------|------------------------|
| $Ca^{2+}$ (mg L <sup>-1</sup> ) | $4.55 \times 10^{-4}$ | $7.089 \times 10^{-4}$ | $8.035 \times 10^{-4}$ |

**Table S3** Comparison of  $\Delta PHRR$  and  $\Delta THR$  for cellulose fibers/fabrics.

| <b>Sample</b> | <b>Flame retardants</b>                         | <b><math>\Delta PHRR</math></b> | <b><math>\Delta THR</math></b> | <b>Ref.</b> |
|---------------|-------------------------------------------------|---------------------------------|--------------------------------|-------------|
| S1            | Trivinylphosphine oxide (TVPO)                  | 40.2                            | 69.2                           | [41]        |
| CS/LS/cotton  | Lignosulfonate/ CS                              | 71.8                            | 52.8                           | [42]        |
| Lyocell@PPCA  | Aspartic acid/ protocatechualdehyde             | 66.2                            | 44.8                           | [43]        |
| FRLF          | Fabricate phosphorylated cellulose              | 50.9                            | 42.6                           | [3]         |
| VF/PPSPB20    | A sulfur-free polymeric flame retardant (PPSPB) | 60.0                            | 60.0                           | [44]        |
| CF-8          | Graphene oxide (GO), phytic acid (PA)           | 60.1                            | 47.5                           | [45]        |
| 3%CH/7%SA     | CS/SA                                           | 48.2                            | 44.6                           | [46]        |
| G-Lyocell-Na  | Sodium glycinate (glycine-Na)                   | 36.5                            | 36.3                           | [47]        |
| A-Lyocell-Na  | Sodium aspartate (aspartate-Na).                | 49.8                            | 34.5                           | [47]        |
| C/L10/PA      | Hdimethyl phosphite lysine (LP)/PA              | 73.8                            | 20.8                           | [48]        |
| CAF           | SA                                              | 76.1                            | 75                             |             |

**Table S4** TG data of RCF and CAF.

| <b>Sample</b> | <b>T<sub>5%</sub><br/>(°C)</b> | <b>T<sub>second</sub><br/>(°C)</b> | <b>T<sub>max</sub><br/>(°C)</b> | <b>Residue at 800 °C<br/>(wt%)</b> |
|---------------|--------------------------------|------------------------------------|---------------------------------|------------------------------------|
| RCF           | 76.01                          | –                                  | 317.78                          | 12.13                              |
| CAF-1         | 70.77                          | 233.46                             | 303.76                          | 24.68                              |
| CAF-2         | 57.15                          | 232.44                             | 300.70                          | 22.70                              |
| CAF-3         | 53.71                          | 226.45                             | 299.69                          | 21.85                              |

**Table S5** LOI values of CAF after cyclic washing<sup>3</sup>.

| <b>Washing<br/>cycles</b> | <b>LOI (%)</b> |              |              |
|---------------------------|----------------|--------------|--------------|
|                           | <b>CAF-1</b>   | <b>CAF-2</b> | <b>CAF-3</b> |
| 0                         | 29.5±0.5       | 30.5±0.5     | 32.0±0.4     |
| 5                         | 28.6±0.3       | 29.8±0.4     | 31.1±0.6     |
| 10                        | 28.0±0.5       | 29.2±0.3     | 30.7±0.5     |
| 20                        | 27.5±0.4       | 28.8±0.5     | 30.3±0.3     |
| 30                        | 27.3±0.5       | 28.7±0.6     | 30.2±0.5     |

| <b>Element</b> | <b>Before combustion<br/>(at.%)</b> | <b>After combustion<br/>(at.%)</b> |
|----------------|-------------------------------------|------------------------------------|
| C              | 72.56                               | 59.68                              |
| O              | 25.58                               | 31.15                              |
| Ca             | 1.86                                | 7.47                               |
| Na             | –                                   | 1.7                                |

**Table S6** Atomic percent in the XPS full spectrum before and after CAF combustion.

## References

3. Q. Zhang, J. Chen, D. Li, L. Sun, Y. Ren, C. Cheng and X. Liu, *Ind. Crops Prod.*, 2023, **199**, 116757.
26. Q. Gao, J. Wang, J. Liu, Y. Wang, J. Guo, Z. Zhong and X. Liu, *Cellulose*, 2021, **28**, 7995–8008.
27. K. Yang, C. Duan, R. Ma, X. Liu, Z. Meng, Z. Xie and Y. Ni, *Carbohydr. Polym.*, 2024, **346**, 122649.
28. W. Feng, L. Zou, C. Lan, S. E and X. Pu, *Adv. Fiber Mater.*, 2024, **6**, 1657–1668.
29. Q. Li, Z. Yuan, C. Zhang, S. Hu, Z. Chen, Y. Wu, P. Chen, H. Qi and D. Ye, *Nano Letters*, 2022, **22**, 3516–3524.
30. Y. Zhu, Y. Zhang, H. Yu, J. Li, W. Jiang, Y. Zhang and X. Wang, *Carbohydr. Polym.*, 2025, **368**, 124190.
31. S. Jiang, S. Jiang, J. Yan, C. Lin, W. Wang, S. Jiang and R. Guo, *Nano Energy*, 2025, **136**, 110688.
32. S. Wei, C. Wan, Q. Huang, H. Chai, Y. Chai, X. Li and Y. Wu, *Int. J. Biol. Macromol.*, 2024, **276**, 134152.
33. H. He, J. Xu, M. H. Mia, Z. Yu, Y. Wan, Q. Jiang, X. Qu, J. Liu, L. Hou, Y. Song and Z. Yu, *Chem. Eng. J.*, 2025, **521**, 167127.
34. R. Zhang, H. Wang, M. Qu, S. Li, Y. Ma, X. Li, P. Tang and Y. Bin, *Chem. Eng. J.*, 2025, **521**, 167127.
35. X. Gao, J. Su, C. Xu, S. Cao, S. Gu, W. Sun and Z. You, *ACS Nano*, 2024, **18**, 17913–

- 17923.
41. X. Bi, Y. Wang, D. Xue, C. Lv, Z. Li, Z. Chen and T. Zhao, *Prog. Org. Coat.*, 2025, **199**, 108949.
42. S.-Q. Li, R.-C. Tang and C.-B. Yu, *Polym. Degrad. Stab.*, 2022, **196**, 109826
43. Y. Liu, J. Zhao, X. Yu, Y. Ren and X. Liu, *Int. J. Biol. Macromol.*, 2024, **259**, 129252.
44. B. Wang, Z.-M. Hou, Y.-J. Xu and Y.-Z. Wang, *Ind. Crops Prod.*, 2025, **231**, 121163.
45. P. Zou, Z. Liu, D. Yang, Y. Li, L. Li, M. Liu, J. Xu and W. Meng, *Colloids Surf., A*, 2025, **717**, 136854.
46. P. Li, C. Liu, Y.-J. Xu, Z.-M. Jiang, Y. Liu and P. Zhu, *Polym. Degrad. Stab.*, 2020, **181**, 109302.
47. Y. Liu, W. Zhao, J. Zhang, Y. Ren, X. Liu and H. Qu, *Cellulose*, 2022, **29**, 5339–5358.
48. X.-H. Shi, C.-Y. Jing, H. Luo, H. Shi and D.-Y. Wang, *Polym. Degrad. Stab.*, 2024, **230**, 111069.
